# Supplementary material for: Fabrication of ZnO nanowires array with nanodiamond as reductant
Source: Royal Society of Chemistry journal article supplement (doi:10.1039/c6ra12398h), 2016-01-01
Supplement: c6ra12398h1.pdf [file c6ra12398h1.pdf]

## Electronic Supplementary Information

### Fabrication of ZnO Nanowires Array with Nanodiamond as Reductant

Xin Li<sup>‡</sup>, Shuanglong Feng<sup>‡</sup>, Shuangyi Liu, Zhenhu Li, Liang Wang, Zhaoyao Zhan, and Wenqiang Lu\*

Chongqing Key Laboratory of Multi-Scale Manufacturing Technology, Chongqing Institute of Green and Intelligent Technology, Chinese Academy of Sciences, Chongqing, 400714, PR China

<sup>‡</sup> Contributed equally

\* Corresponding author. Tel.: +86 23 6593 5639; fax: +86 23 6593 5000. E-mail address: wqlu@cigit.ac.cn.

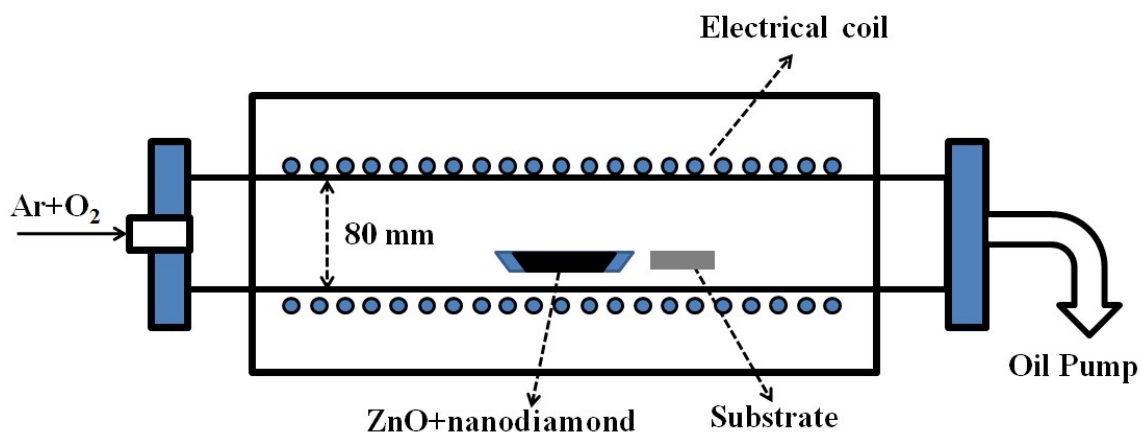

**Fig. S1.** The schematic illustration of the chemical vapor deposition set-up for ZnO nanowire growth

(the mass of ZnO and diamond in this experiment were 0.21g, and 0.07g, respectively.)

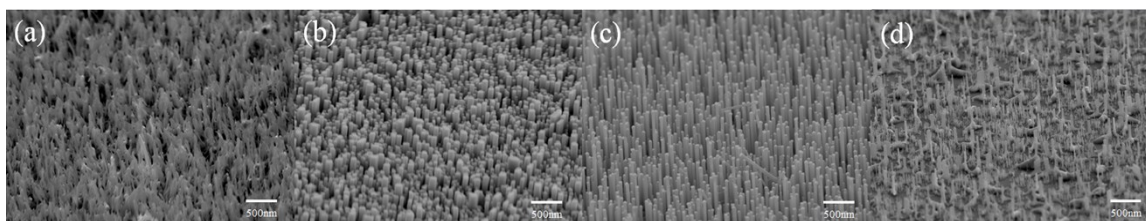

**Fig. S2.** SEM images of obtained ZnO nanorods in 960 °C reaction with different reactants (a) ZnO+graphite, (b) ZnO+100nm nanodiamond, (c) ZnO+10nm nanodiamond, and (d) SEM image of obtained ZnO nanorods in 600°C reaction with ZnO+10nm nanodiamond without Au catalyst.

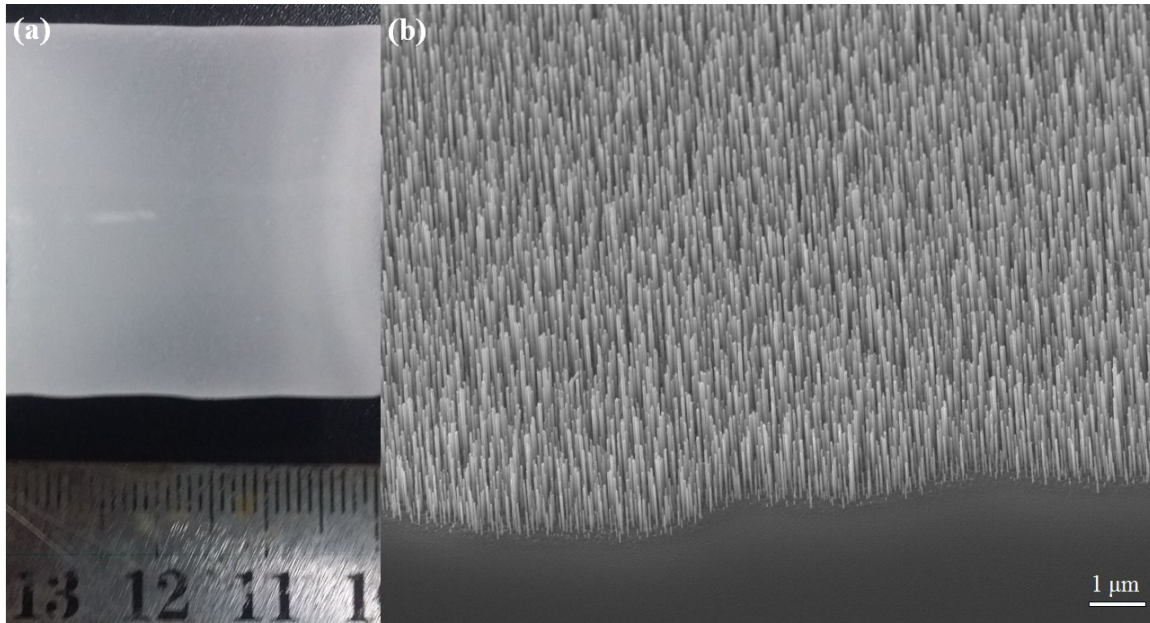

Fig. S3. The (a) optical and (b) low magnification SEM images of obtained ZnO nanorods in 600 °C reaction for 8 hours.

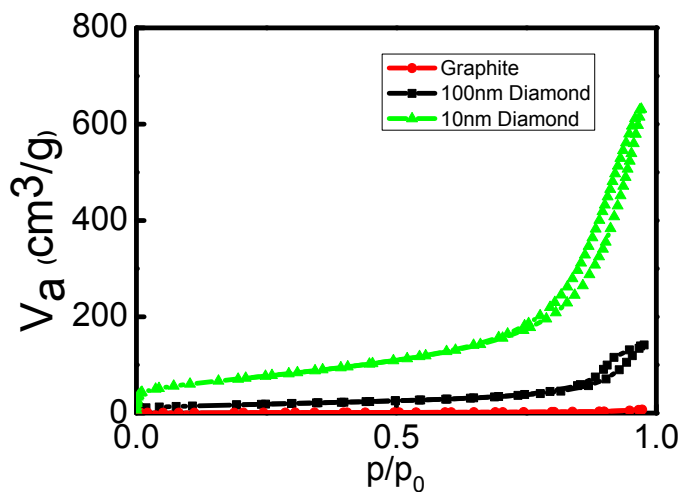

Fig. S4. The nitrogen adsorption–desorption isotherms of different allotropes of carbon

### Calculation of Debye characteristic temperature of 10 nm and 100nm nanodiamond

The Debye characteristic temperature of 10 nm and 100nm nanodiamond was calculated based on X-ray diffraction intensities by the methods introduced by X.S. Lu<sup>1</sup>.

Lu's method can be described as follows:

In the X-ray diffraction, the natural logarithm of the ratio of the calculated intensities to the observed intensities  $\ln(I_{calc} / I_{obs})$  should have the linear relationship with  $\sin^2 \theta / \lambda^2$ . The slope should be  $2B$ . In Debye theory of specific heat,  $B$  can be expressed as

$$B = (6h^2T / Mk\Theta_D^2)[\Phi(x) + x / 4]$$

Of which,  $x = \Theta_D / T$ .

If we assumed  $G = BMkT / 6h^2$ ,  $\Phi(x) + x / 4 = Gx^2$ . If we got the value of  $B$  from the X-ray diffraction data,

the G can be calculated. Then x can be determined by the graphic method. If we let  $y_1 = Gx$ ,  $y_2 = \Phi(x) + x/4$ , two curves can be obtained in the coordinate graph. The intersection of the two curves is the x value. Finally, Debye characteristic temperature can be calculated with the obtained x value.

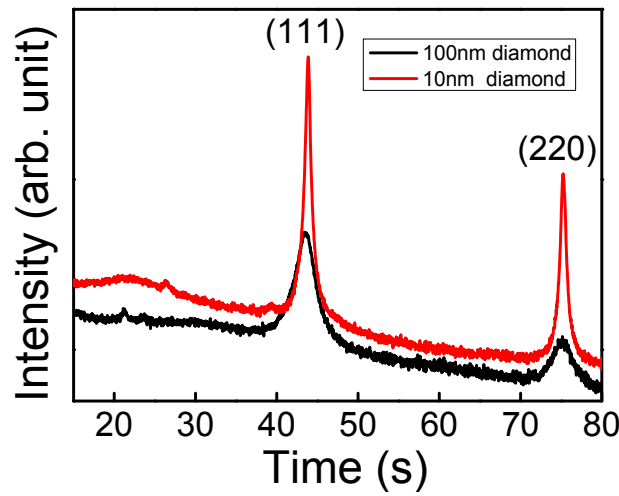

Fig. S5 The XRD diffraction pattern of 10nm diamond and 100nm diamond.

The X-ray diffraction results were shown in table S1.

Table S1. The raw data and calculation results

| hkl | $\theta/^\circ\text{C}$ | f      | $ F ^2$ | J     | P     | $I_{calc}$ | $I_{obs}$ | $\ln(I_{calc}/I_{obs})$ |        |
|-----|-------------------------|--------|---------|-------|-------|------------|-----------|-------------------------|--------|
| 111 | 10nm                    | 43.398 | 3.125   | 312.5 | 8.178 | 8          | 20425     | 3587                    | 0.755  |
|     | 100nm                   | 43.822 | 3.125   | 312.5 | 8.178 | 8          | 20425     | 50674                   | -0.395 |
| 220 | 10nm                    | 75.090 | 2.028   | 263.2 | 2.815 | 12         | 8891.5    | 537                     | 1.219  |
|     | 100nm                   | 75.228 | 2.028   | 263.2 | 2.815 | 12         | 8891.5    | 9512                    | -0.293 |

- (1) X-ray atomic scattering factor f (to  $\sin\theta/\lambda \text{ \AA}^{-1}$ ), can be calculated after looking up the table<sup>2</sup>.
- (2) The structure factor is calculated by the following equation<sup>2</sup>,

$$|F|^2 = FF^* = \left| \sum_m f_m \exp[-2\pi i r_m \cdot \mathbf{OG}] \right|^2$$

For diamond cell, m=8, there are 8 atoms in the unit cell. The position coordinates are  $000, \frac{1}{2}, \frac{1}{2}, 0, 0, \frac{1}{2}, \frac{1}{2}, \frac{1}{2}$

$\frac{1}{2}, \frac{1}{4}, \frac{1}{4}, \frac{1}{4}, \frac{3}{4}, \frac{3}{4}, \frac{1}{4}, \frac{1}{4}, \frac{3}{4}, \frac{3}{4}, \frac{3}{4}, \frac{1}{4}, \frac{3}{4}$ . Therefore, the calculation results should be  $|F_{(111)}|^2 = 32f_{(111)}^2$ ,

$$|F_{(220)}|^2 = 64f_{(220)}^2.$$

- (3) The expression of the angular factor J is

$$J = (1 + \cos^2 2\theta_B) / (\sin^2 \theta_B \cdot \cos \theta_B)$$

The value can be calculated by above equation as well as looking up the table<sup>1</sup>.

- (4) The multiplicity factor P can be found in the table through the crystal surface index (hkl).

(5) The calculation intensities  $I_{calc}^2$  can be calculated as

$$I_{calc} = KN_0^2VFF^*$$

In which, K is a scaling factor;  $N_0^2V$  is the number of unit cells that can produce diffraction.

The calculated values of the above quantities are shown in table S1.

From the linear relationship between  $\ln(I_{calc} / I_{obs})$  and  $\sin^2 \theta / \lambda^2$ , B can be calculated. Then, G can be calculated with the constant parameters (atom mass  $1.66053 \times 10^{-24}$  g,  $k = 1.38062 \times 10^{-23}$  J · K,  $h = 6.62620 \times 10^{-34}$  J · s). After G was obtained, x can be determined by the graphic method. As we know  $\Theta_D = x \cdot T$ , the Debye characteristic temperature can be calculated.

**Table S2.** The Debye temperature of nanodiamond and graphite

| Average diameter | B/nm <sup>2</sup> | T/C | G       | x     | $\Theta_D$ /K |
|------------------|-------------------|-----|---------|-------|---------------|
| 10nm             | 0.03698           | 20  | 0.95868 | 1.002 | 304           |
| 100nm            | 0.008219          | 20  | 0.213   | 2.166 | 646           |

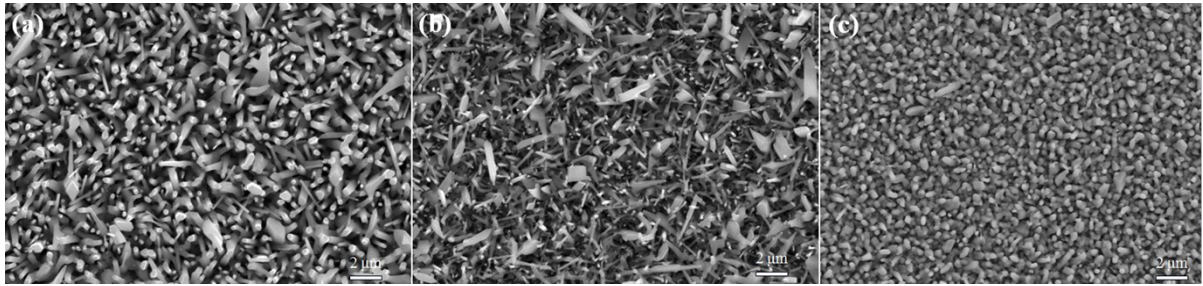

**Fig. S6** The SEM images of ZnO nanostructures obtained in (a)Si, (b)SiO<sub>2</sub>, and (c)FTO substrates

## REFERENCES

1. P. W. Chen, S. R. Yun, F. L. Huang, Y. S. Ding and Q. Chen, *Chinese J of High Pressure Phys*, 2001, **15**, 32-38.
2. B. D. Cullity and J. W. Weymouth, *Elements of x-ray diffraction*, Addison-Wesley Pub. Co.
